# Supplementary material for: Bifunctional electrolyte additive KI to improve the cycling performance of Li–O2 batteries
Source: Royal Society of Chemistry journal article supplement (doi:10.1039/c8nj02910e), 2018-01-01
Supplement: c8nj02910e1.pdf [file c8nj02910e1.pdf]

## Supporting Information

Bifunctional electrolyte additive KI to improve the cycling performance of Li-O<sub>2</sub> batteries†

Changjin Li,<sup>ab</sup> Zhengyi Qian,<sup>ab</sup> Yulin Ma,<sup>\*ab</sup> Pengjian Zuo,<sup>ab</sup> Chunyu Du,<sup>ab</sup> Hua Huo,<sup>ab</sup> and Geping Yin<sup>ab</sup>

<sup>a</sup> Institute of Advanced Chemical Power Sources, School of Chemistry and Chemical Engineering, Harbin Institute of Technology, Harbin 150001, China

E-mail: mayulin@hit.edu.cn; Tel.: +86-451-86403961; Fax: +86-451-86413721

<sup>b</sup> MIIT Key Laboratory of Critical Materials Technology for New Energy Conversion and Storage, Harbin Institute of Technology, Harbin 150001, China

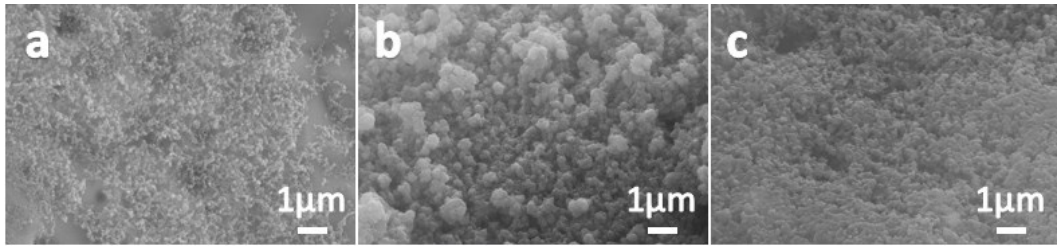

Fig. S1. SEM image of (a) pristine cathode, (b) after recharge in the base electrolyte, (c) after recharge in the electrolyte with 0.05 M LiI

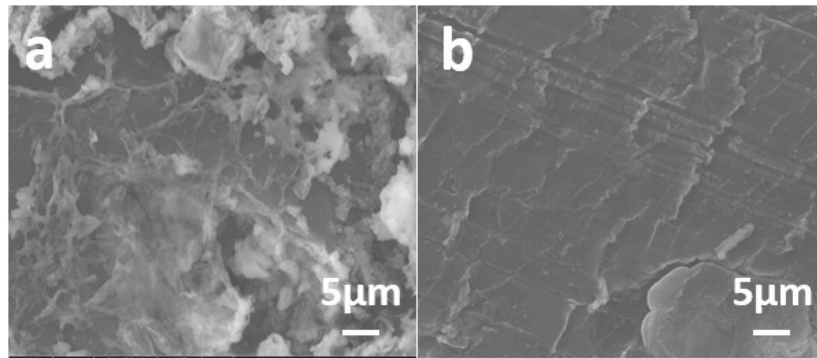

Fig. S2. SEM image of the Li anode in Li-O<sub>2</sub> batteries after 50th cycles in the electrolyte (a) without additive, (b) with 0.05 M KTFSI

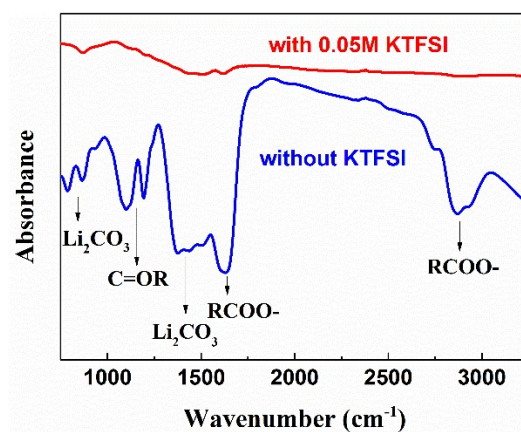

Fig. S3. FTIR spectra of Li anode in Li-O<sub>2</sub> batteries after 50th cycles with different electrolytes

Table S1. The percentage of the component on the Li anode calculated from the C1s

XPS spectra

| Component                     | Without KTFSI (%) | With KTFSI (%) | With KI (%) |
|-------------------------------|-------------------|----------------|-------------|
| C-C                           | 37.85             | 61.03          | 61.37       |
| C=OR                          | 21.33             | 14.59          | 15.26       |
| COOR                          | 24.67             | 9.27           | 7.61        |
| CO <sub>3</sub> <sup>2-</sup> | 16.15             | 15.1           | 15.76       |

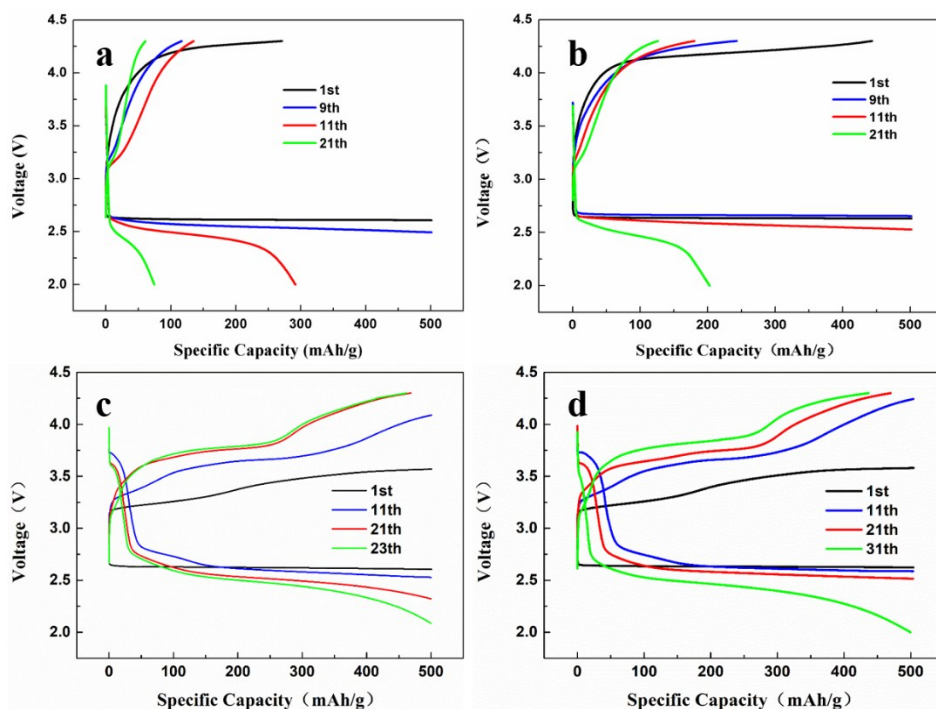

Fig. S4 The discharge and charge curves of Li-O<sub>2</sub> batteries during cycles (a) without additive (b) with 0.05M KTFSI (c) with 0.05 M Lil (d) with 0.05 M KI

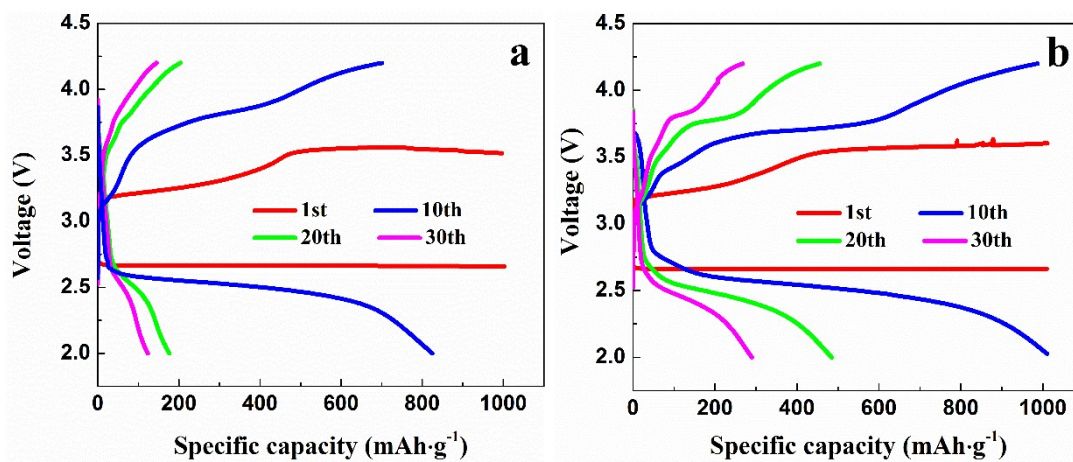

Fig. S4. Cycling performance of Li-O<sub>2</sub> batteries with limited capacity of 1000 mAh·g<sup>-1</sup> in the electrolyte (a) with 0.05 M Lil, (b) with 0.05 M KI
